# Supplementary material for: Trinuclear pyridyl functionalised hydroxylaminato complexes of aluminium, gallium and indium
Source: Royal Society of Chemistry journal article supplement (doi:10.1039/c0dt00334d), 2010-01-01
Supplement: c0dt00334d.pdf [file c0dt00334d.pdf]

# Supporting Information

## Trinuclear pyridyl functionalised hydroxylamino complexes of aluminium, gallium and indium

Benjamin J. Hellmann, Andreas Mix, Beate Neumann, Hans-Georg Stammer and Norbert W. Mitzel\*

Lehrstuhl für Anorganische Chemie und Strukturchemie, Universität Bielefeld, Universitätsstraße 25, 33615 Bielefeld, Germany, E-mail: mitzel@uni-bielefeld.de – Homepage: [www.uni-bielefeld.de/chemie/ac3/ak-mitzel/start.html](http://www.uni-bielefeld.de/chemie/ac3/ak-mitzel/start.html)

Additional NMR spectra of compounds **1**, **2** and **3** at various temperatures and in different solvents are given.

[Al(CH<sub>3</sub>)<sub>2</sub>ON(C<sub>2</sub>H<sub>4</sub>-*o*-py)<sub>2</sub> · 2 AlMe<sub>3</sub>] (**1**):

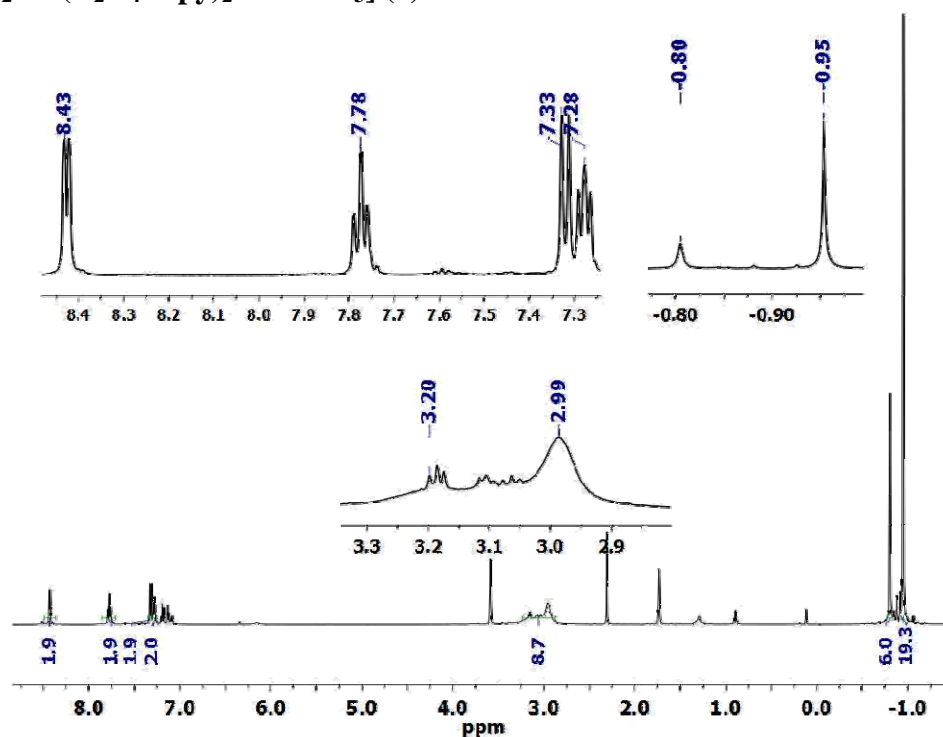

Figure 1: <sup>1</sup>H NMR spectrum in [D<sub>8</sub>]thf of **1** at rt.

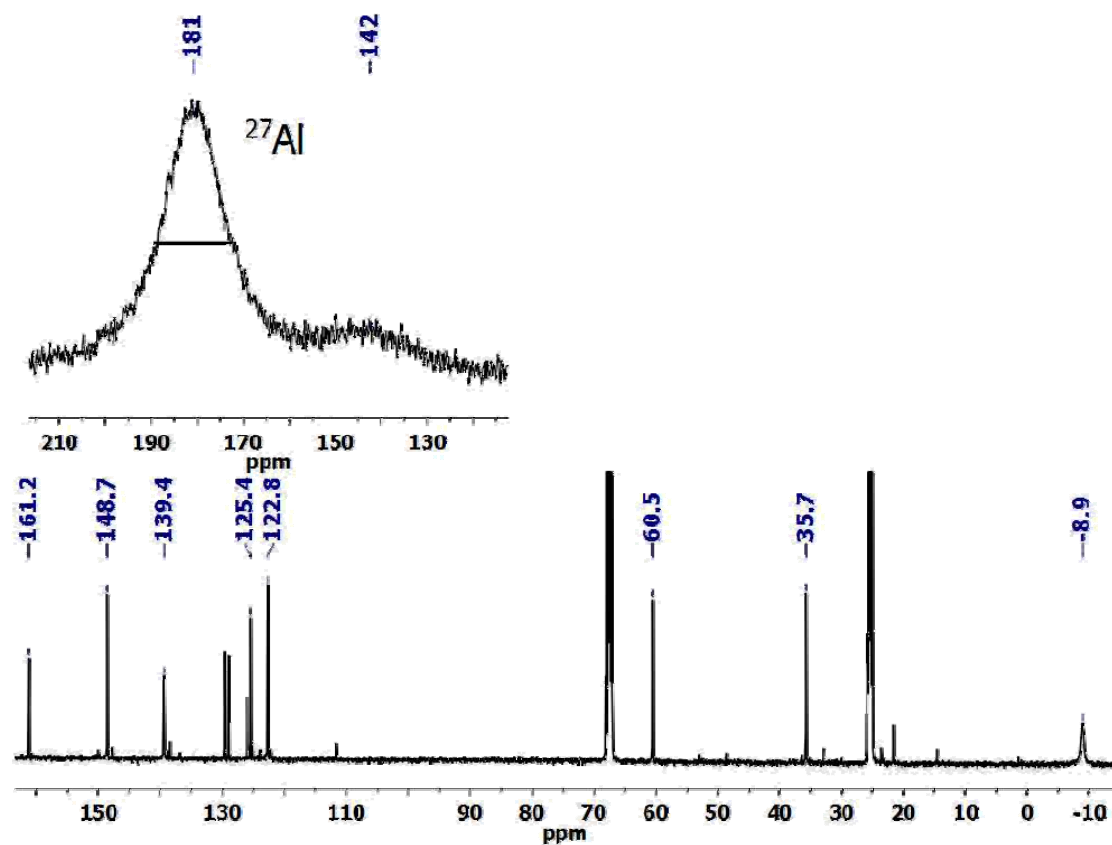

Figure 2: <sup>27</sup>Al and <sup>13</sup>C NMR spectra in [D<sub>8</sub>]thf of **1** at rt.

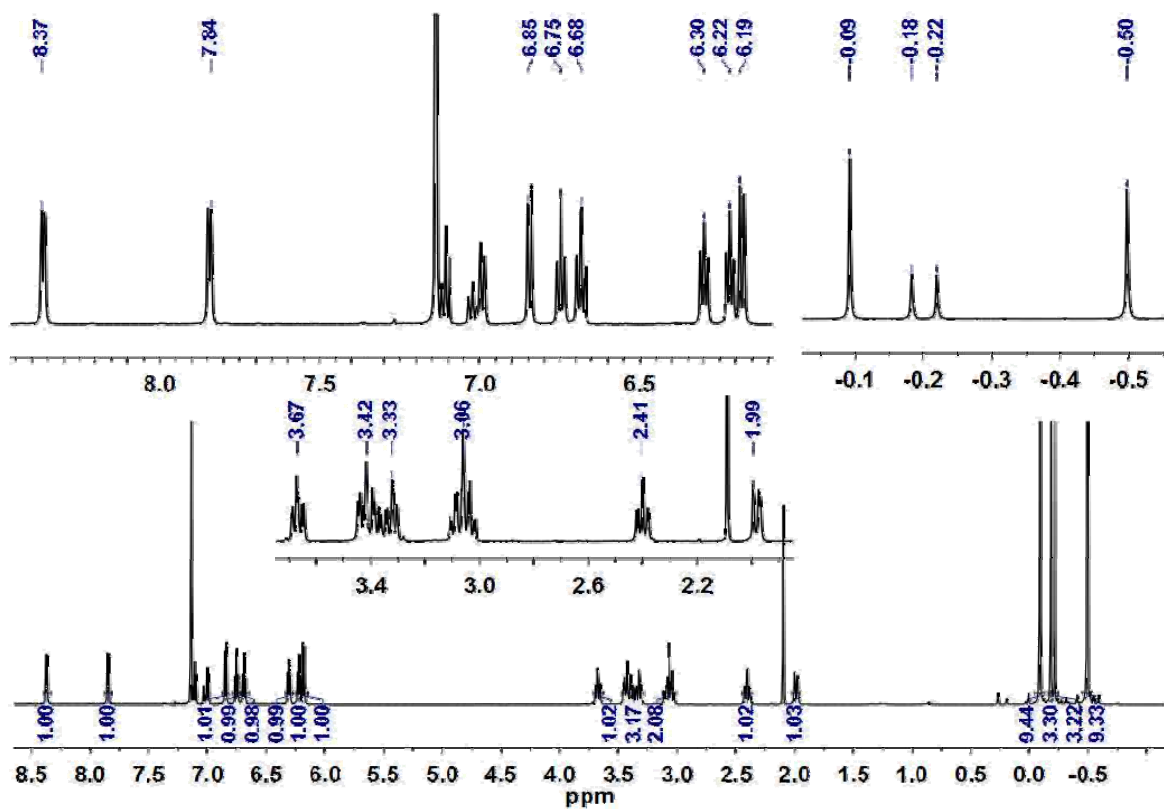

Figure 3: <sup>1</sup>H NMR spectra in [D<sub>6</sub>]benzene of **1** at rt.

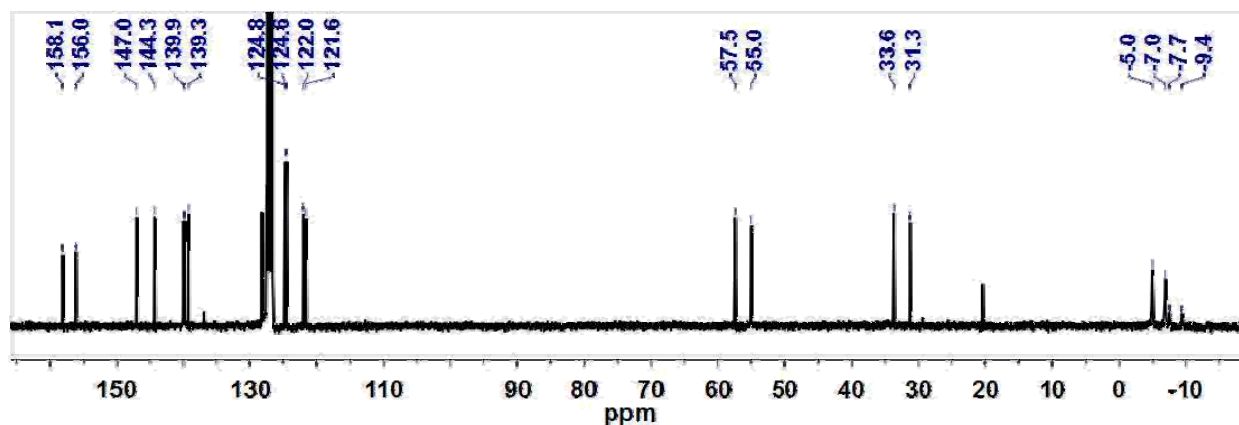

Figure 4:  $^{13}\text{C}$  NMR spectra in  $[\text{D}_6]$ benzene of **1** at rt.

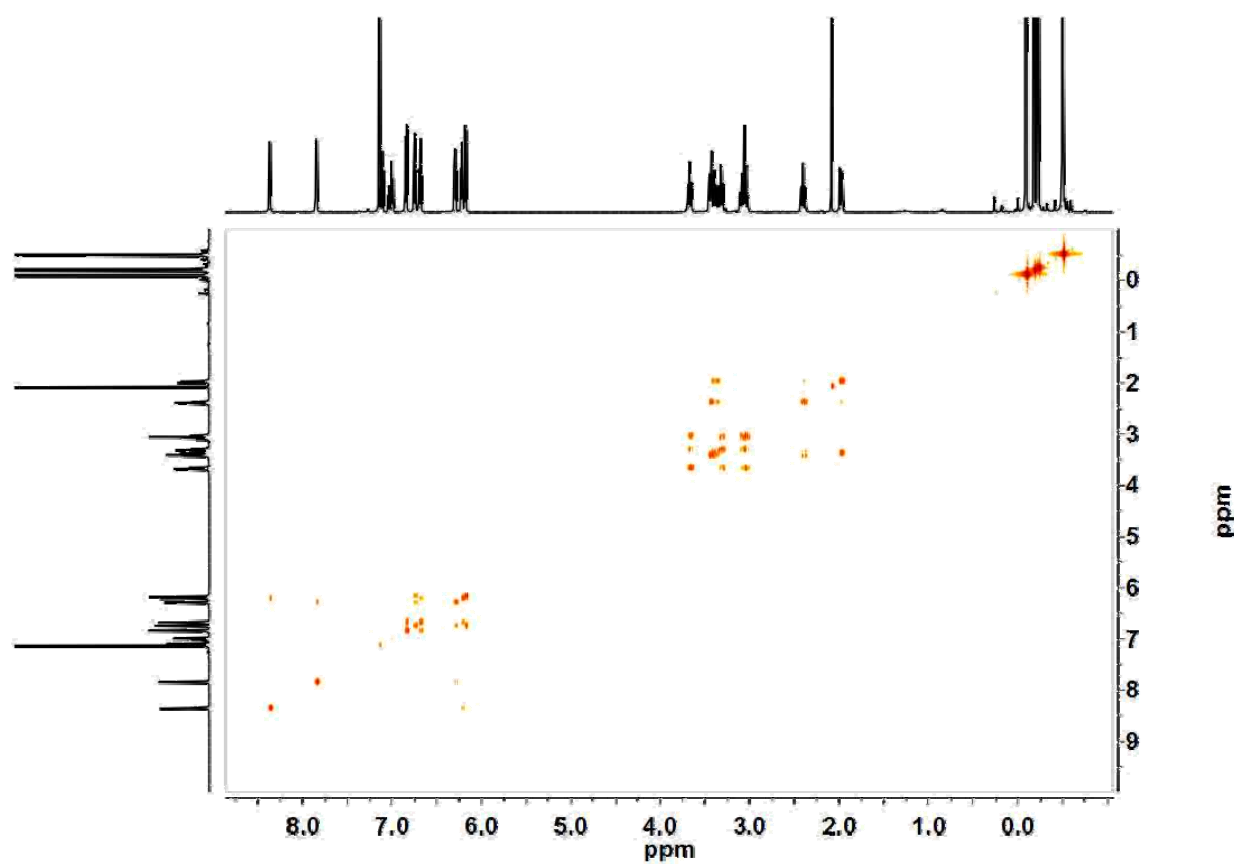

Figure 5:  $^1\text{H}$ - $^1\text{H}$  COSY NMR spectra in  $[\text{D}_6]$ benzene of **1** at rt.

**[Ga(CH<sub>3</sub>)<sub>2</sub>ON(C<sub>2</sub>H<sub>4</sub>-*o*-py)<sub>2</sub> · 2 AlMe<sub>3</sub>] (2):**

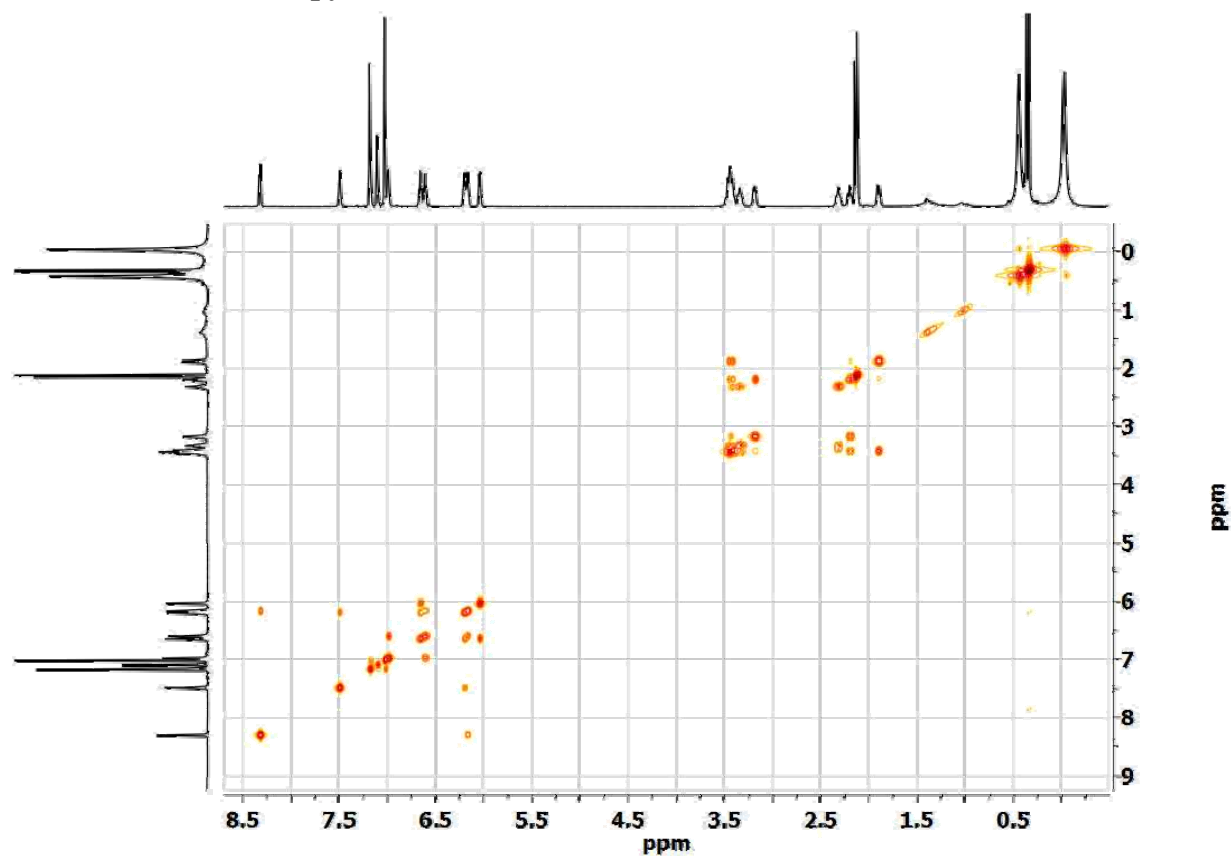

**Figure 6:** <sup>1</sup>H-<sup>1</sup>H COSY NMR spectra in [D<sub>8</sub>]toluene of **2** at -60° C.

**[In(CH<sub>3</sub>)<sub>2</sub>ON(C<sub>2</sub>H<sub>4</sub>-*o*-py)<sub>2</sub> · 2 InMe<sub>3</sub>] (3):**

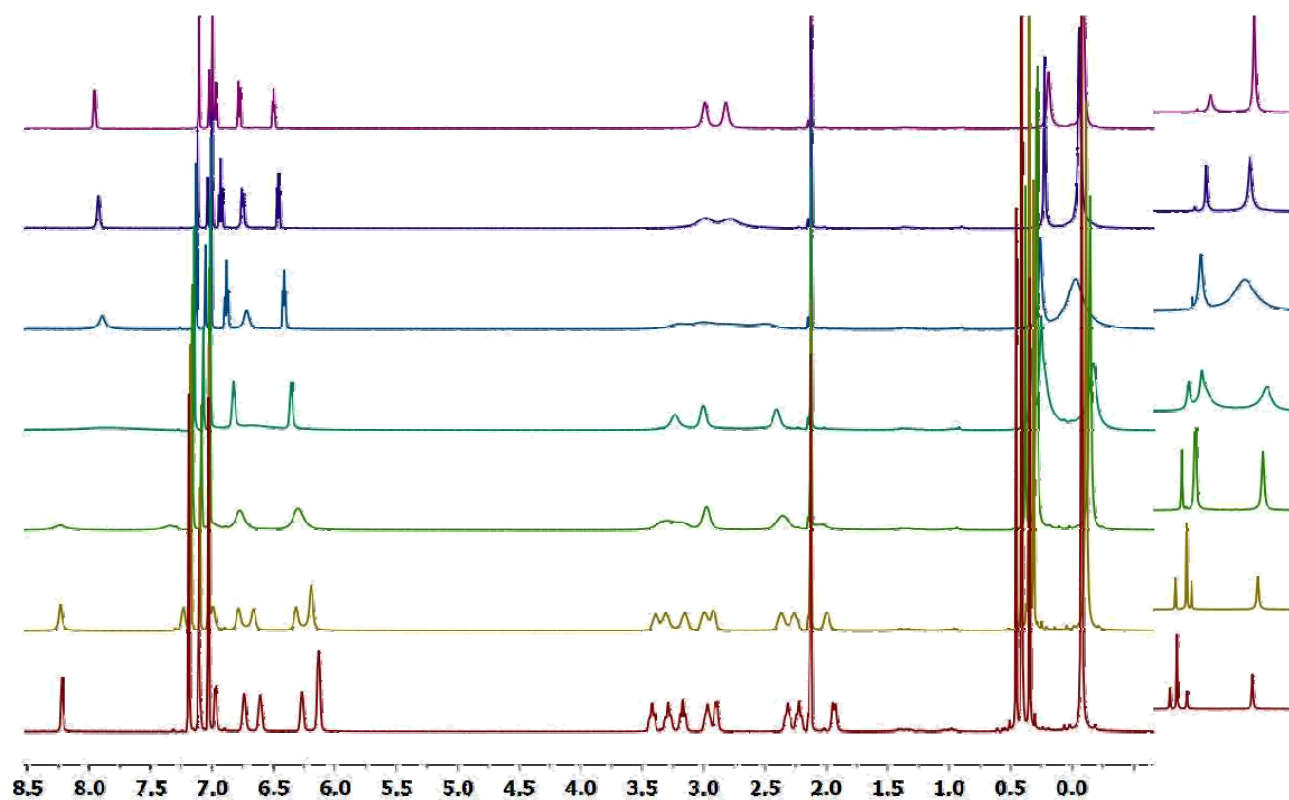

**Figure 7:** VT <sup>1</sup>H NMR spectra in [D<sub>8</sub>]toluene of **3** at from 60° C to -60° C. For clarity a section of the spectra from 0.5 to -0.3 ppm can be found expanded on the right side.
